# Supplementary material
Source: MDPI journal article supplement (https://www.mdpi.com/2073-4441/14/24/4105)
Supplement: s1 [file s1]

# Supplementary Materials

## Metal ions removal from contaminated water using membranes functionalized with ionic liquids

Lavinia Lupa <sup>1</sup>, Laura Cocheci <sup>1</sup>, Adina Maria Dobos <sup>2</sup>, Mihaela Dorina Onofrei <sup>2</sup>, Petru Negrea <sup>1</sup> and Anca Filimon <sup>2,\*</sup>

<sup>1</sup> Faculty of Industrial Chemistry and Environmental Engineering, Politehnica University Timisoara, 6 Vasile Parvan-Boulevard, 300223 Timisoara, Romania

<sup>2</sup> Polycondensation and Thermostable Polymers Department, "Petru Poni" Institute of Macromolecular Chemistry, Grigore Ghica Voda Alley 41A, 700487 Iasi, Romania

\* Correspondence: [afilimon@icmpp.ro](mailto:afilimon@icmpp.ro)

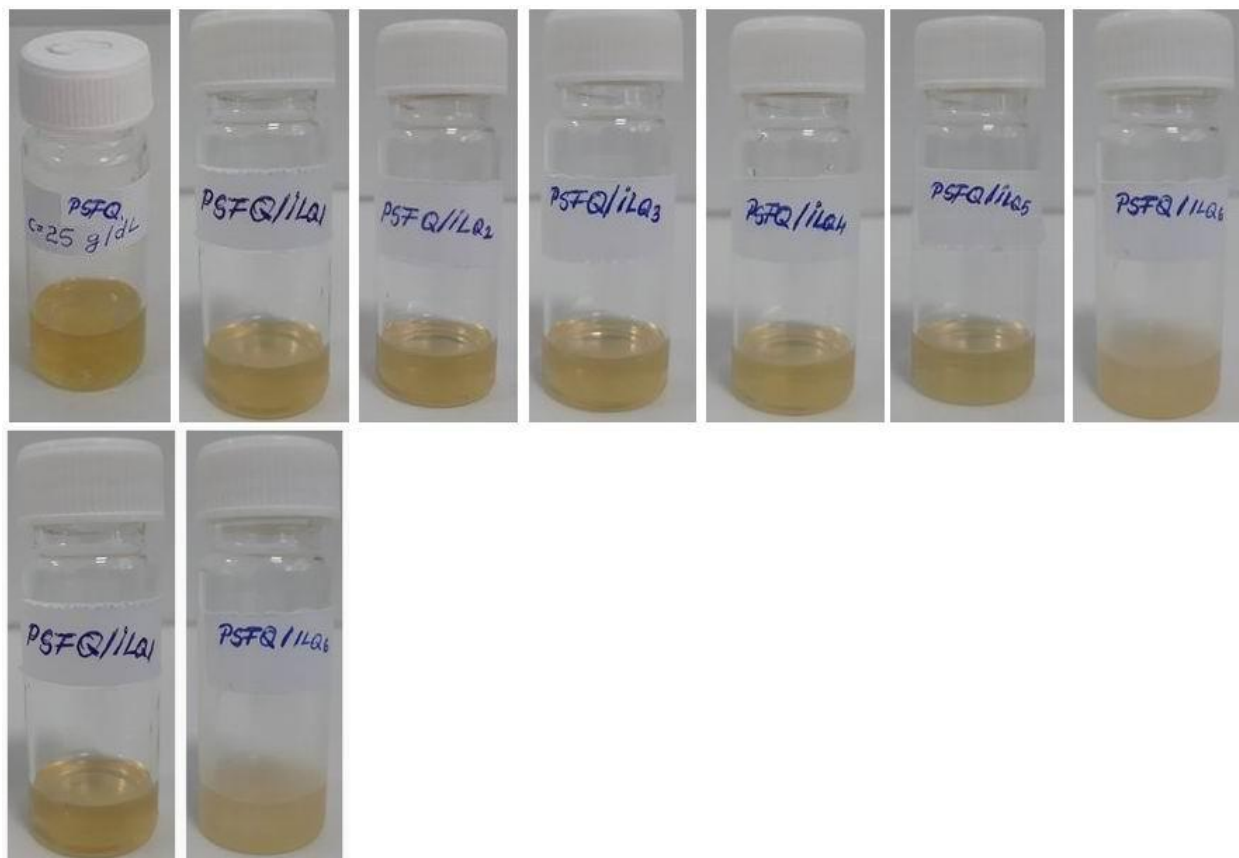

**Figure S1.** Solutions of quaternized polysulfone (PSFQ) with Aliquat 336 ionic liquid (ILQ) in different mixing ratios of 25 g/dL concentration: 0 wt.% content of Aliquat 336 (PSFQ), 3 wt.% content of Aliquat 336 (PSFQ/ILQ<sub>1</sub>), 5 wt.% content of Aliquat 336 (PSFQ/ILQ<sub>2</sub>), 10 wt.% content of Aliquat 336 (PSFQ/ILQ<sub>3</sub>), 15 wt.% content of Aliquat 336 (PSFQ/ILQ<sub>4</sub>), 20 wt.% content of Aliquat 336 (PSFQ/ILQ<sub>5</sub>), 25 wt.% content of Aliquat 336 (PSFQ/ILQ<sub>6</sub>). Visualization of the compatibility limit for the studied system (3 wt.% content of Aliquat 336 (PSFQ/ILQ<sub>1</sub>) compared with 25 wt.% content of Aliquat 336 (PSFQ/ILQ<sub>6</sub>).

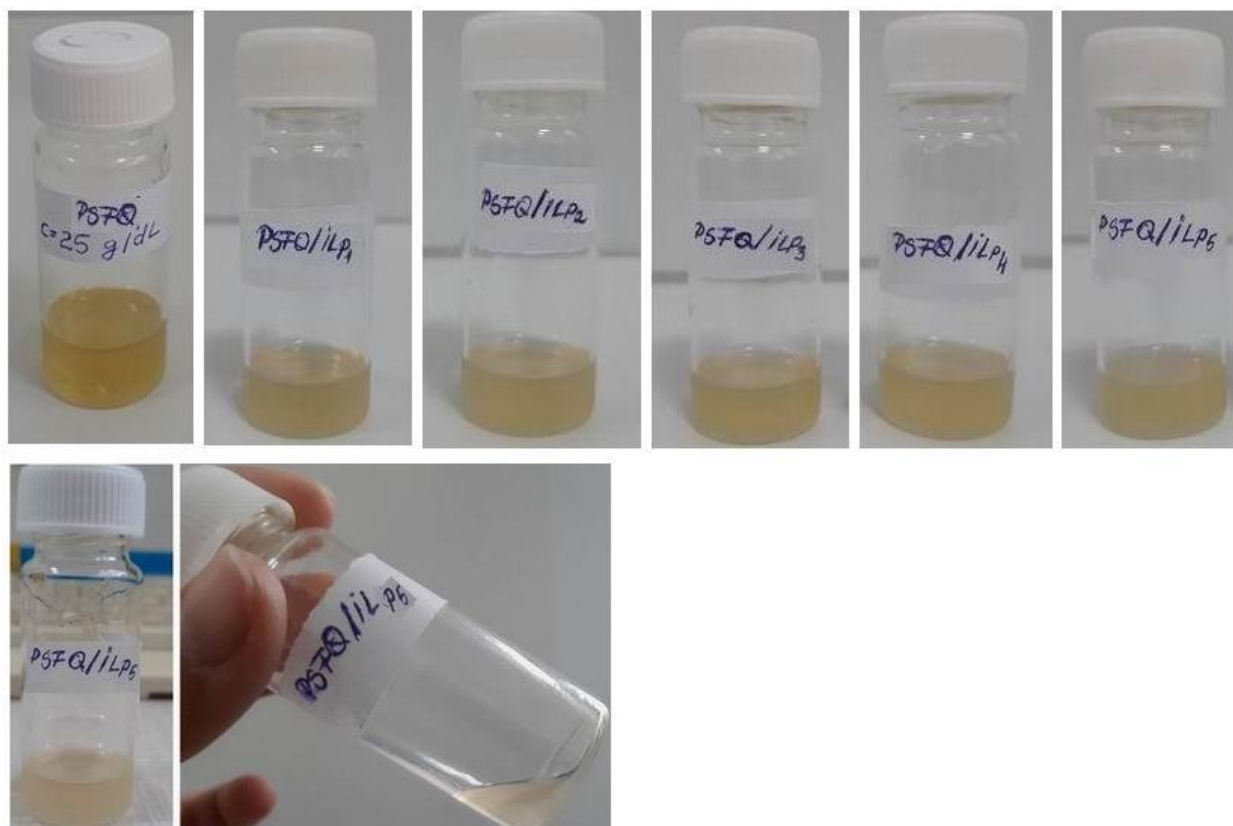

**Figure S2.** Solutions of quaternized polysulfone (PSFQ) with Cyphos IL 101 ionic liquid (ILP) in different mixing ratios of 25 g/dL concentration: 0 wt.% content of Cyphos IL 101 (PSFQ), 3 wt.% content of Cyphos IL 101 (PSFQ/IL<sub>P1</sub>), 5 wt.% content of Cyphos IL 101 (PSFQ/IL<sub>P2</sub>), 10 wt.% content of Cyphos IL 101 (PSFQ/IL<sub>P3</sub>), 15 wt.% content of Cyphos IL 101 (PSFQ/IL<sub>P4</sub>), 20 wt.% content of Cyphos IL 101 (PSFQ/IL<sub>P5</sub>). Visualization of the compatibility limit for the studied system (20 wt.% content of Cyphos IL 101 (PSFQ/IL<sub>Q5</sub>)).
